# Supplementary material for: How concave are river channels?
Source: Copernicus journal article supplement (doi:10.5194/esurf-6-505-2018), 2018-06-22
Supplement: Supplementary file 2 [file esurf-6-505-2018-supplement.zip]

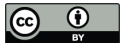

## *Supplement of*

# How concave are river channels?

**Simon M. Mudd et al.**

*Correspondence to:* Simon M. Mudd ([simon.m.mudd@ed.ac.uk](mailto:simon.m.mudd@ed.ac.uk))

- esurf-6-505-2018-supplement-title-page.pdf
- Example\_parameter\_files
  - Analysis\_files
    - \* Model\_landscapes
    - \* Real\_landscapes
  - MuddPILE\_model
    - \* movern\_0p35
    - \* movern\_0p5
    - \* movern\_0p65
  - Sensitivity\_analyses
    - \* La\_Gomera\_sigma
    - \* Loess\_channel\_extraction
  - readme.asc
  - readme.pdf
- supplemental\_materials.pdf

The copyright of individual parts of the supplement might differ from the CC BY 4.0 License.
